# Supplementary material for: The Role of RASs /RVs in the Current Management of HCV
Source: MDPI journal article supplement (doi:10.3390/v13102096), 2021-10-18
Supplement: s1 [file s1]

| <b>Table S1. Retreatment options in DAA failure.</b> |                                                                                                       |                                                                                                                                        |
|------------------------------------------------------|-------------------------------------------------------------------------------------------------------|----------------------------------------------------------------------------------------------------------------------------------------|
| <b>Genotype</b>                                      | <b>Regimen failure</b>                                                                                | <b>Retreatment options</b>                                                                                                             |
| GT1a                                                 | Daclatasvir/sofosbuvir<br>Ledipasvir/sofosbuvir                                                       | Sofosbuvir/velpatasvir<br>Glecaprevir/pibrentasvir<br>Sofosbuvir/velpatasvir/voxilaprevir<br>Sofosbuvir/grazoprevir/elbasvir/ribavirin |
|                                                      | Ritonavir-boosted<br>paritaprevir, ombitasvir, and<br>dasabuvir (3D)                                  | Sofosbuvir/grazoprevir/elbasvir/ribavirin<br>Sofosbuvir/velpatasvir/voxilaprevir<br>Sofosbuvir plus glecaprevir/ pibrentasvir          |
| GT1b                                                 | Daclatasvir/sofosbuvir<br>Ledipasvir/sofosbuvir                                                       | PI with a second-generation NS5A<br>inhibitor<br>Sofosbuvir/velpatasvir/voxilaprevir                                                   |
| GT3                                                  | Daclatasvir/sofosbuvir                                                                                | Glecaprevir/pibrentasvir<br>Sofosbuvir/velpatasvir/voxilaprevir<br>(With ribavirin in difficult-to-treat cases)                        |
| GT4                                                  | Daclatasvir/sofosbuvir<br>Ledipasvir/sofosbuvir<br>Ritonavir-boosted<br>paritaprevir, ombitasvir (2D) | Sofosbuvir/velpatasvir<br>Sofosbuvir/velpatasvir/voxilaprevir                                                                          |
